# Supplementary material for: Role of Surface Defects on Photoinduced Reactivity in SiO2 Nanoparticles
Source: MDPI journal article supplement (doi:10.3390/inorganics11110430), 2023-11-02
Supplement: s1 [file s1]

# Supporting Information

## Role of Surface Defects on Photoinduced Reactivity in SiO<sub>2</sub> Nanoparticles

Roberto D'Amato <sup>1</sup>, Giulia Quaglia <sup>1</sup>, Roberta Selvaggi <sup>2</sup>, Fabio Marmottini <sup>2</sup> and Loredana Latterini <sup>1,\*</sup>

<sup>1</sup> Nano4Light, Department of Chemistry, Biology and Biotechnology, University of Perugia, Via Elce di Sotto 8, 06123 Perugia, Italy; roberto.damato1@unipg.it (R.D.); quagliagiulia09@gmail.com (G.Q.)

<sup>2</sup> Department of Chemistry, Biology and Biotechnology, University of Perugia, Via Elce di Sotto 8, 06123 Perugia, Italy; roberta.selvaggi@unipg.it (R.S.); fabio.marmottini@unipg.it (F.M.)

\* Correspondence: loredana.latterini@unipg.it

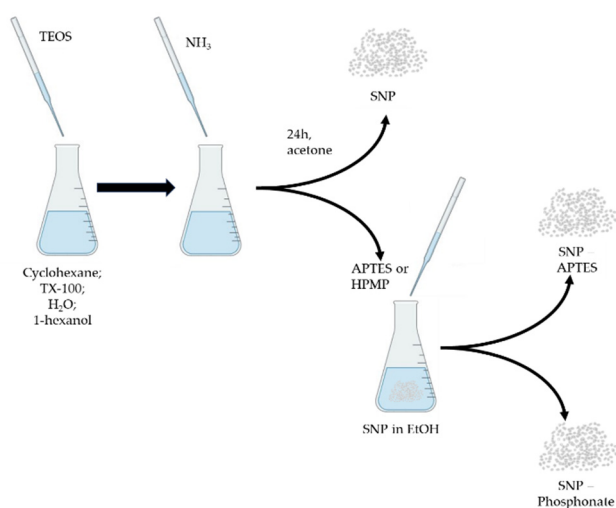

**Figure S1.** Schematic synthetic procedures for the preparation of SNP, SNP-APTES and SNP-Phosphonate.

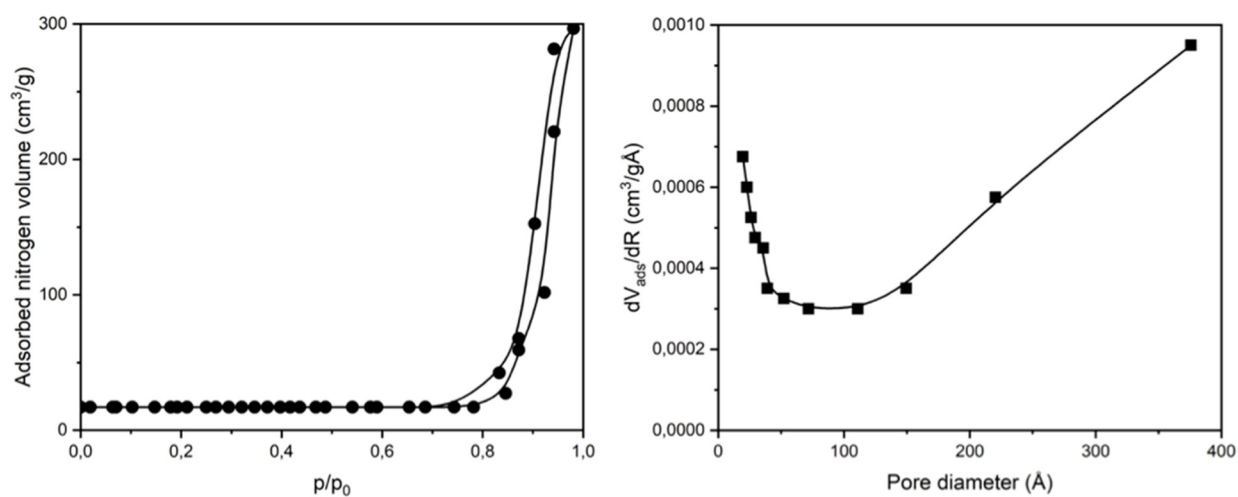

**Figure S2.** Nitrogen adsorption and desorption isotherms, at 77K, of SNP on the left and pore size distribution calculated from nitrogen adsorption data of SNP on the right.

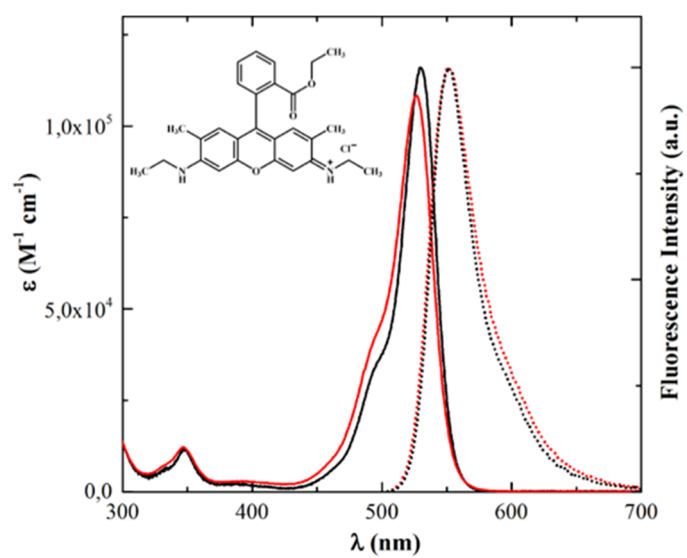

**Figure S3.** UV-Vis absorption (solid) and fluorescence ( $\lambda_{exc} = 490$  nm; dotted) spectra of Rhodamine 6G in ethanol (black) and in water (red).

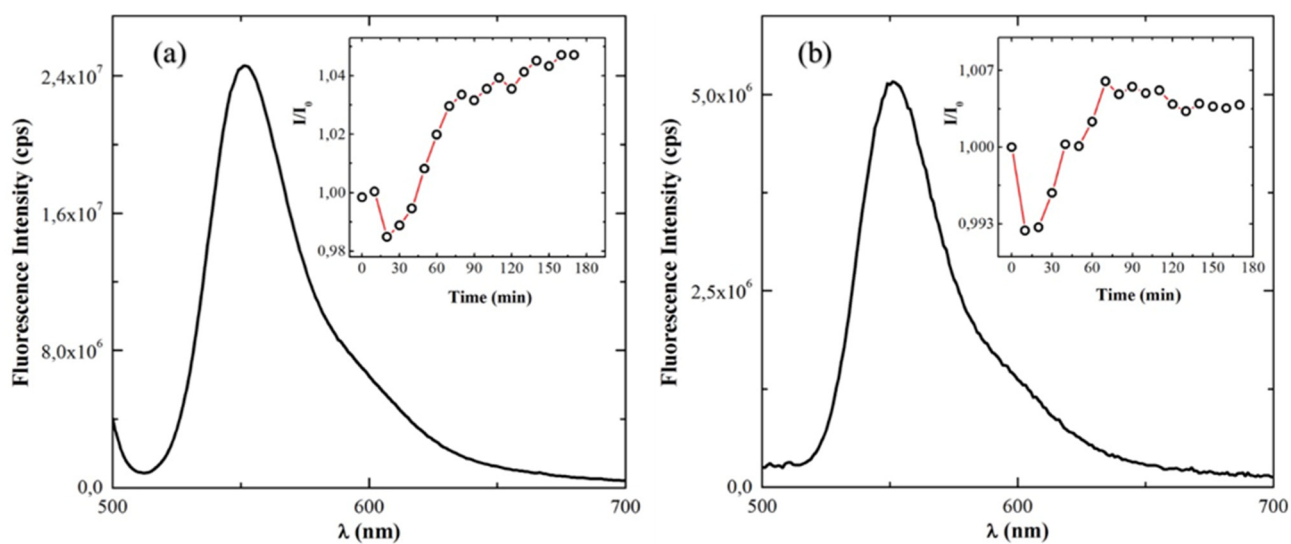

**Figure S4.** Fluorescence spectra of Rhodamine 6G in the presence of SNP52 in water and ethanol ( $\lambda_{\text{exc}} = 490$  nm); Inset: fluorescence intensity recorded at 552 nm upon storage in the dark the samples.
